# Supplementary material
Source: PubMed Central journal article supplement (PMC11027685)
Supplement: 262_2019_2465_MOESM1_ESM.pdf [file 262_2019_2465_MOESM1_ESM.pdf]

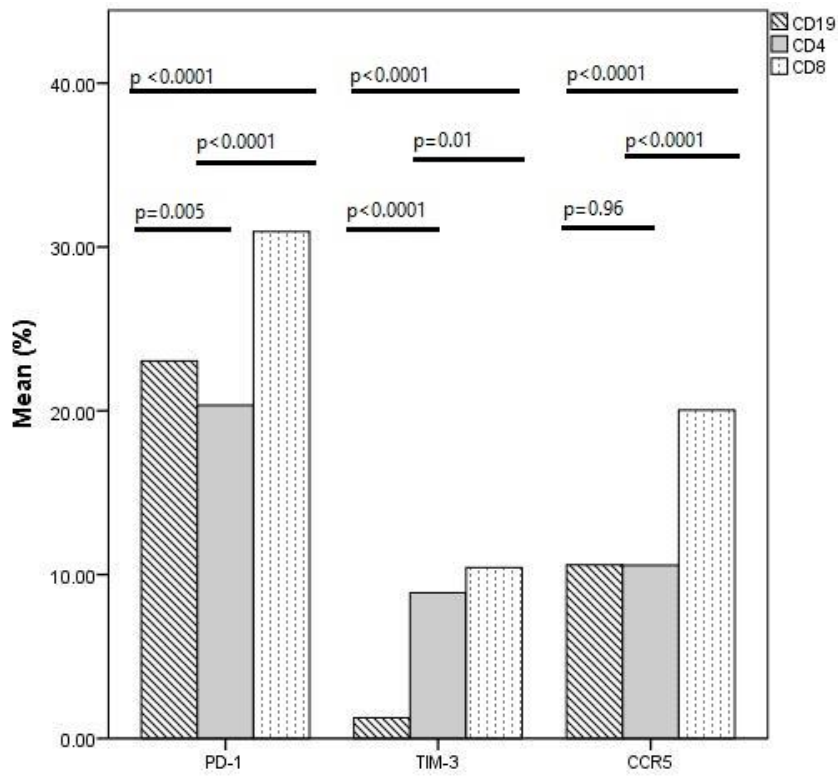

**"supplementary figure 1": The highest expression of Tim-3, PD-1, and CCR5 in the hepatocellular carcinoma patients is by CD8<sup>+</sup> cells.**
